# Supplementary material
Source: PubMed Central journal article supplement (PMC2867736)
Supplement: 0907696107_pnas.200907696SI.pdf [file 0907696107_pnas.200907696SI.pdf]

# Supporting Information

Ammirante et al. 10.1073/pnas.0907696107

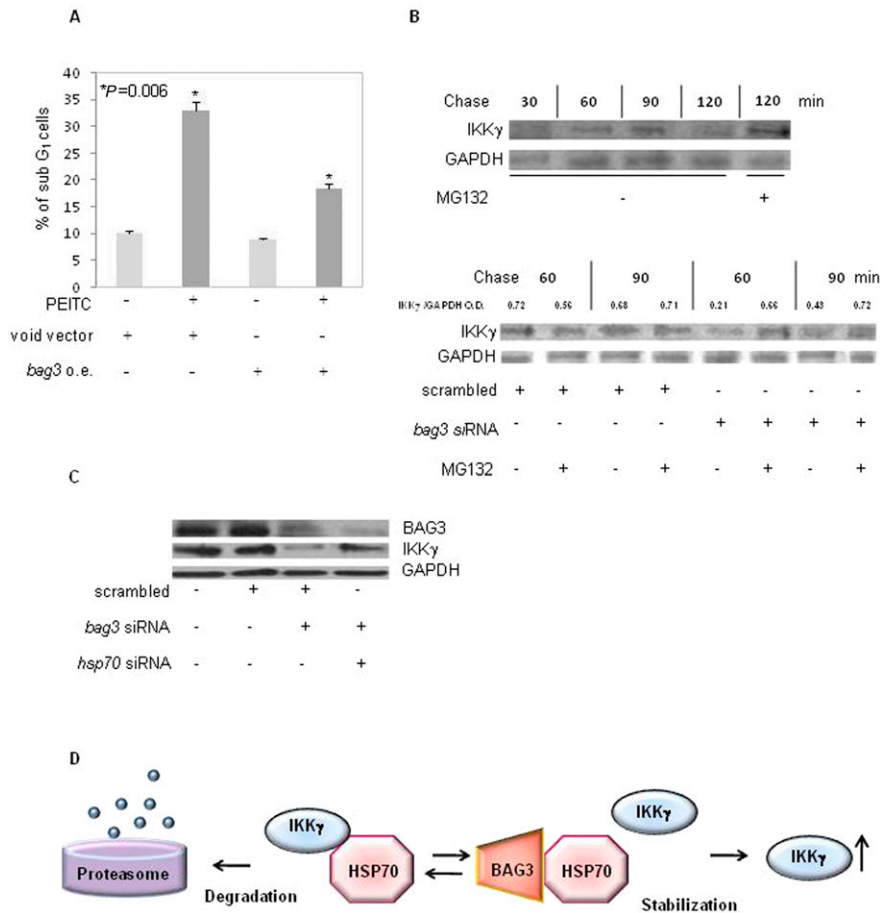

**Fig. S1.** (A) M14 cells were transfected with either a *bag3* overexpressing (o.e.) vector or a void vector. After 48 h, cells were treated with PEITC (25  $\mu$ M). After an additional 18 h, apoptosis was evaluated as the percentage of sub-G<sub>1</sub> cells by propidium iodide staining in flow cytometry. (B) M14 cells were transfected with *bag3* siRNA or a control scrambled RNA (200 nM); after 72 h, cells were labeled for 30 min with 150  $\mu$ Ci/mL [<sup>35</sup>S]methionine and [<sup>35</sup>S]cysteine (ICN Biochemicals), washed, and chased for the indicated time with fresh medium containing unlabeled amino acids and cycloheximide (1  $\mu$ M; Sigma) in presence or absence of the proteasome inhibitor MG132 (1  $\mu$ M) (Alexis Biochemicals). Cell lysates were obtained and precleared using protein A-Sepharose (Amersham Biosciences), and proteins were immunoprecipitated with anti-IKK $\gamma$  or anti-GAPDH antibody (Santa Cruz Biotechnology). Immune complexes were resolved by SDS/PAGE, gels were dried and autoradiographed, and band intensity was quantified by densitometry. (C) M14 cells were transfected with *bag3* siRNA, a control scrambled RNA (200 nM) and/or an *hsp70*-specific siRNA (target sequence: 5'-AAG AAC CAG GUG GCG CUG AAC-3'). After 96 h, total cell lysates were analyzed for their content of IKK $\gamma$  and BAG3; an antibody recognizing GAPDH was used to monitor equal loading conditions. (D) Proposed mechanism for BAG3 modulation of HSP70 association with IKK $\gamma$  and its regulation.
